# Supplementary material for: Laboratory Assay Evaluation Demystified: A Review of Key Factors Influencing Interpretation of Test Results Using Different Assays for SARS-CoV-2 Infection Diagnosis
Source: Oxford University Press journal article supplement (doi:10.1093/labmed/lmaa045), 2020-06-05

**SUPPLEMENTAL INFORMATION**

Let denote sensitivity as x (0<x<1), specificity as y (0<y<1), prevalence as p (0<p<1), positive predictive value (PPV) as f, and negative predictive value (NPV) as g, we have:

- (1)
- (2)

**1) Relationship between PPV and prevalence:**

To investigate the relationship between PPV (f) and prevalence (p), we consider the following:

- (3)
- (4)

Given x, y, and p are between 0 and 1, (y-1) must be ≤0 and thus, -x(y-1) is ≥0. Furthermore, (px-y-p+py+1)2 is always non-negative and thus, is ≥0.

We examine the denominator of equation (4). We have:

This suggests that depends on (x+y-1). If x+y-1≥0 and y-1≤0 (based on the boundary of y), then p(x+y-1)-(y-1)≥0. Hence, ≤0 and thus, f is a concave function with respect to p (when x+y-1≥0).

On the other hand, if x+y-1<0 and p is between 0 and 1, we have:

Hence, when x+y-1<0, ≥0 and thus, PPV (f) is a convex function with respect to prevalence (p, Supplemental Figure 1).

**2) Relationship between PPV and sensitivity:**

To investigate the relationship between PPV (f) and sensitivity (x), we consider the following:

- (5)
- (6)

Given x, y, and p are non-negative, (p-1) and (y-1) must be ≤0. Furthermore, (px-y-p+py+1)2 is always non-negative and thus, ≥0.

As suggested in section 1 above (equation 4), px-y-p+py+1≥0. Hence, 0 and thus, PPV (f) is a concave function with respect to sensitivity (x, Supplemental Figure 2)

**3) Relationship between PPV and specificity:**

To investigate the relationship between PPV (f) and specificity (y), we consider the following:

- (7)
- (8)

Given x, y, and p are non-negative, (p-1) must be ≤0 and thus, -px(p-1) must be ≥0. Furthermore, ((p-1)(y-1)+px)2 is always non-negative and thus, ≥0.

Similarly, 2px(p-1)2 is always non-negative. Moreover, (p-1)(y-1) is ≥0 and therefore, (p-1)(y-1)+px is always non-negative and thus, ≥0. Hence, PPV (f) is a convex function with respect to sensitivity (y, Supplemental Figure 3).

**4) Relationship between NPV and prevalence:**

To investigate the relationship between NPV (g) and prevalence (p), we consider the following:

- (9)
- (10)

Given x, y, and p are non-negative, (x-1) must be ≤0 and thus, y(x-1) is always ≤0. Furthermore, (p+y-px-py)2 is always ≥0 and thus, ≤0.

We examine equation (10) by evaluating its denominator:

Given the boundary conditions of x, y, and p between 0 and 1, (1-x) is ≥0 and (p-1) is ≤0. Hence, p(1-x)-y(p-1) (or p+y-px-py) is always ≥0. Therefore, the value of depends on x+y-1. If x+y-1≥0, then ≤0 (and thus, NPV (g) is a concave function with respect to prevalence [p]), and vice versa, if x+y-1<0, then >0 (and thus, NPV (g) is a convex function with respect to prevalence [p], Supplemental Figure 1).

**5) Relationship between NPV and sensitivity:**

To investigate the relationship between NPV (g) and sensitivity (x), we consider the following:

- (11)
- (12)

Given x, y, and p are non-negative values, (1-p) must be ≥0 and thus, py(1-p) must be ≥0. Furthermore, (p(1-x)+y(1-p))2 is always non-negative and thus, is ≥0.

Similarly, 2p2y(1-p) is always ≥0. Moreover, (1-x) and (1-p) are ≥0 and thus, p(1-x)+y(1-p) is non-negative. Hence, p(x-1)+y(p-1) is always non-negative and thus, ≥0. Hence, NPV (g) is a convex function with respect to sensitivity (x, Supplemental Figure 2).

**6) Relationship between NPV and specificity:**

To investigate the relationship between NPV (g) and specificity (y), we consider the following:

- (13)
- (14)

Given x, y, and p are non-negative values, (x-1) and (p-1) must be ≤0 and thus, p(p-1)(x-1) is ≥0. Furthermore, (p+y-px-py)2 is always non-negative and thus, ≥0.

As shown in section (4) above (equation 10), p+y-px-py is always ≥0. Furthermore, x-1 must be ≤0 and hence, 2p(p-1)2(x-1)≤0. Thus, ≤0 and NPV (g) is a concave function with respect to specificity (y, Supplemental Figure 3).

**Supplemental Figure S1**: PPV and NPV as a function of prevalence (while keeping sensitivity and specificity constant). PPV (solid red line) and NPV (blue line with stars) were constructed using a sensitivity of 95% and a specificity of 90%. Similarly, a second PPV (green line with circles) and NPV (black line with triangles) were constructed using a sensitivity of 75% and a specificity of 70%. As seen, the prevalence drives significant rate of increase in PPV at the low end (of prevalence) and significant rate of decrease in NPV at the high end (of prevalence).


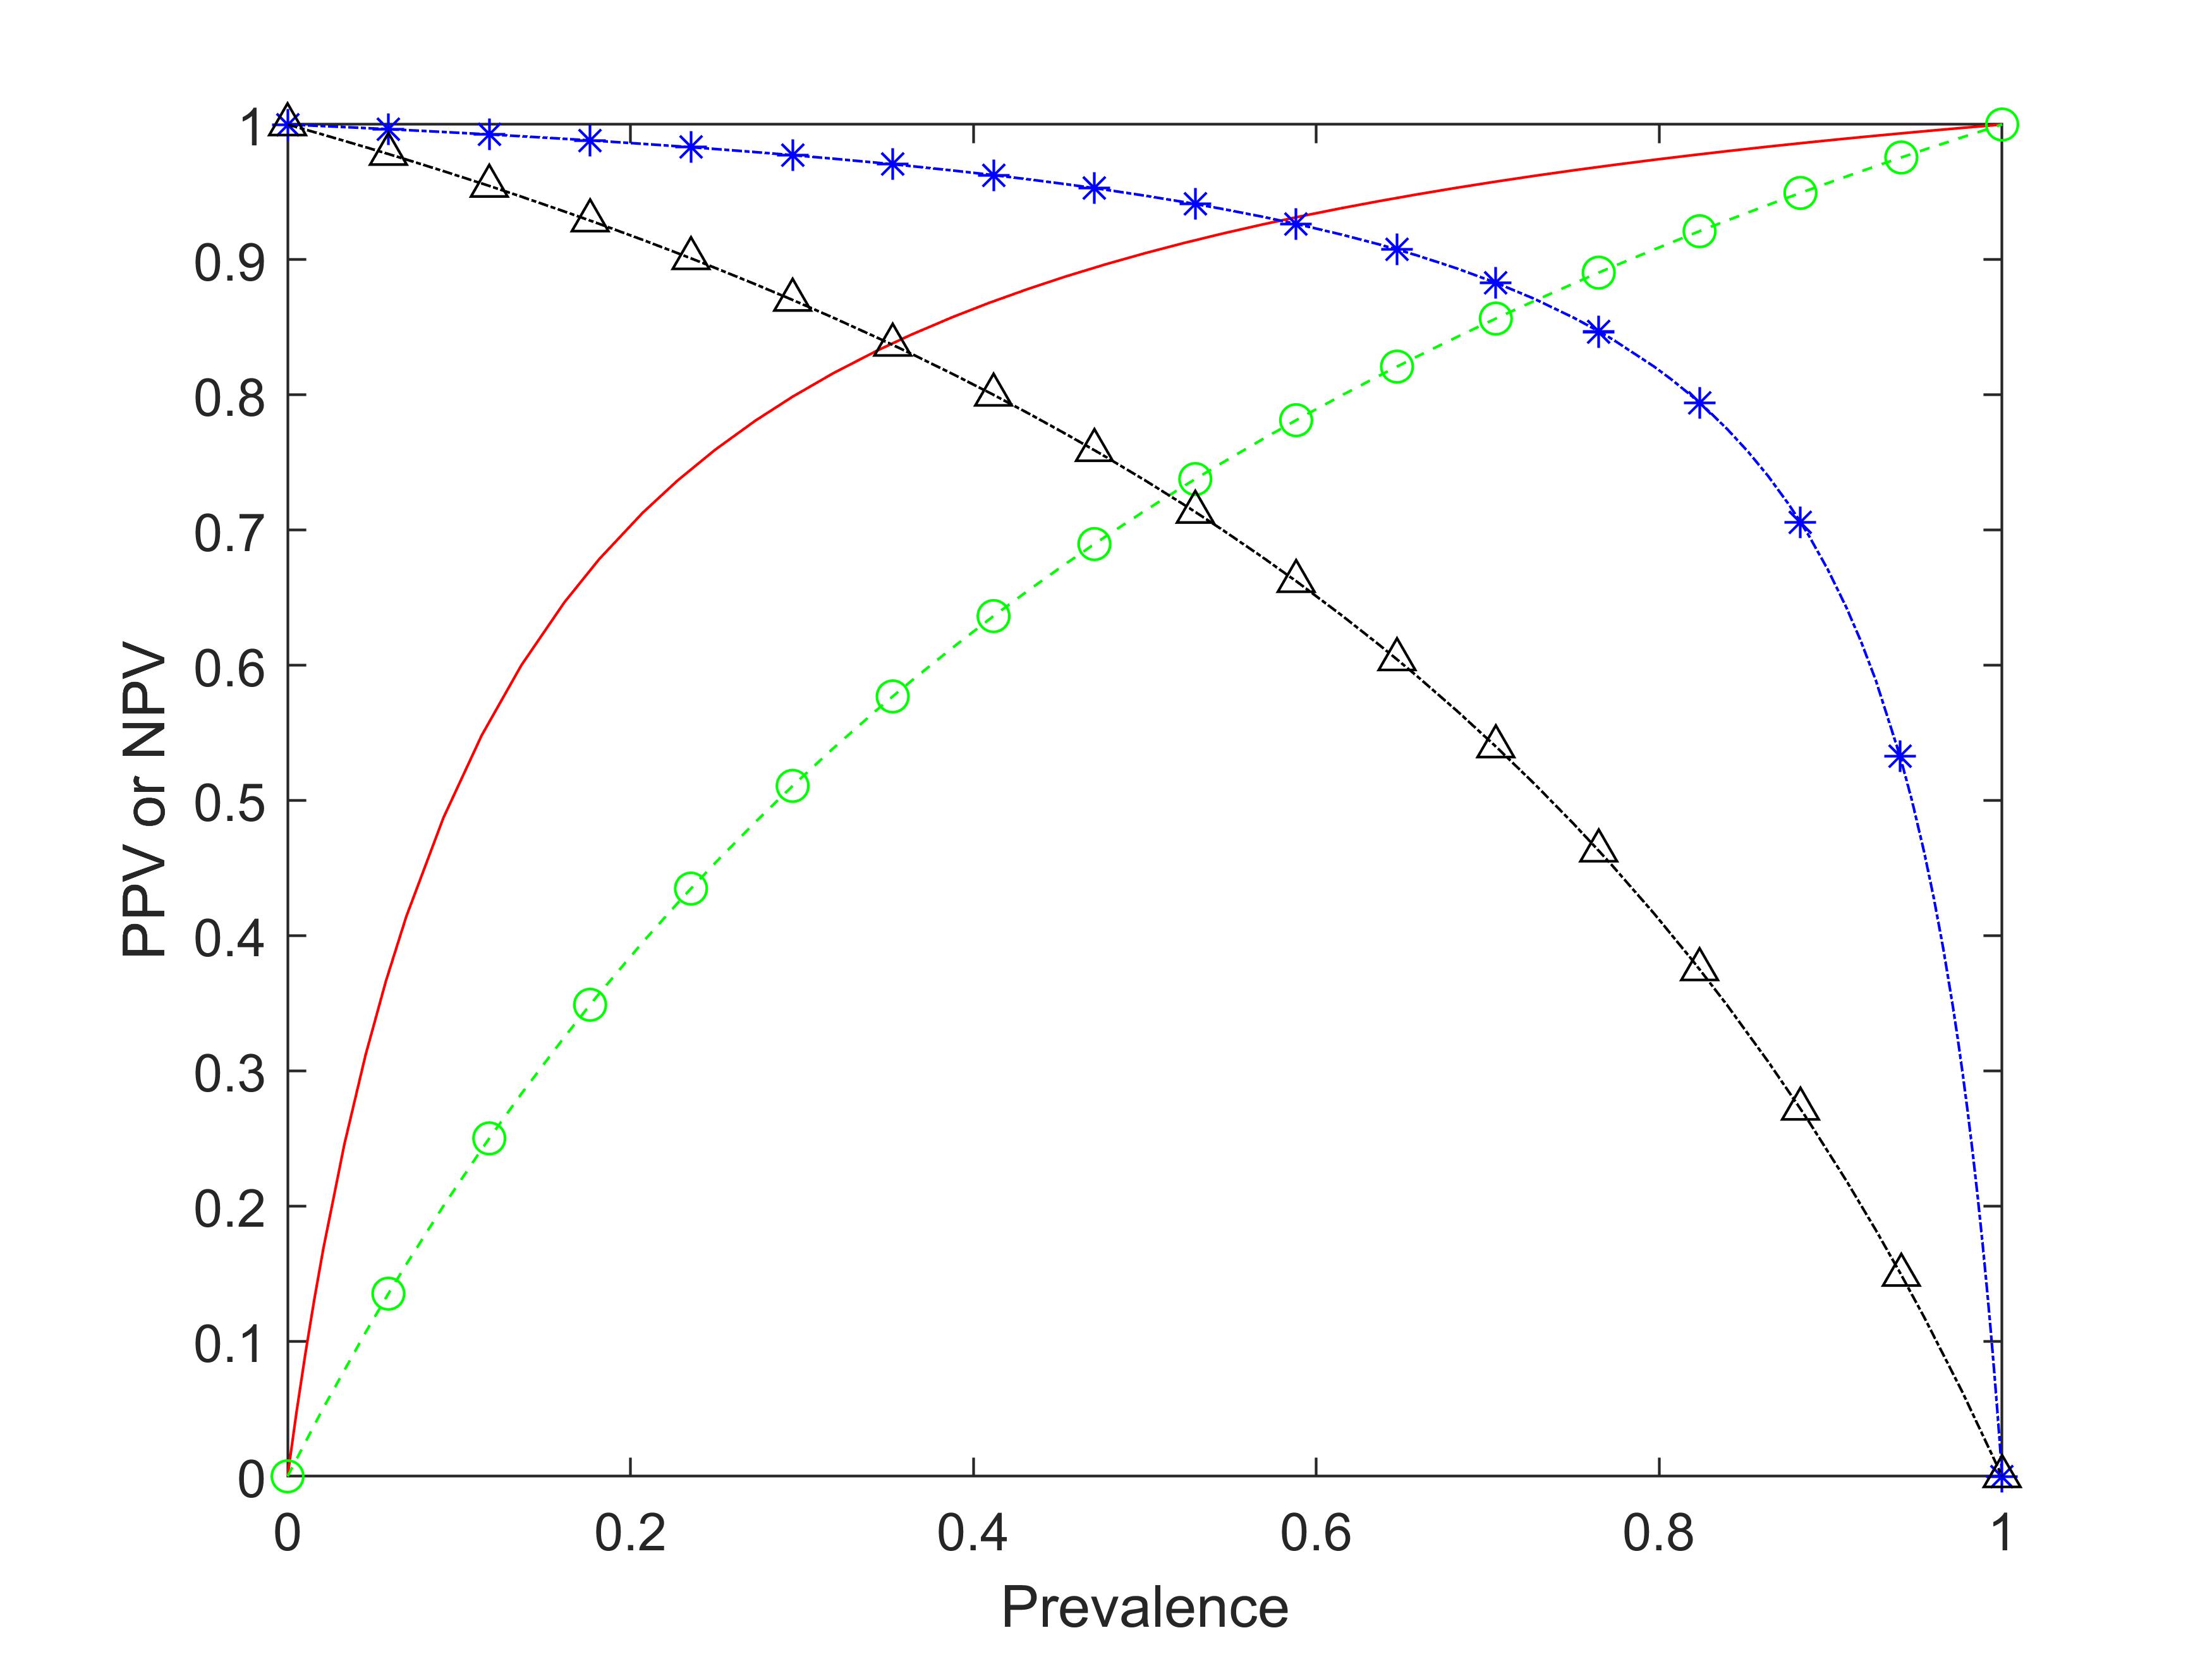


**Supplemental Figure S2**: PPV and NPV as a function of sensitivity (while keeping the prevalence and specificity constant). PPV (solid red line) and NPV (blue line with stars) were constructed using a prevalence of 10% and a specificity of 90%. Similarly, a second PPV (green line with circles) and NPV (black line with triangles) were constructed using a prevalence of 40% and a specificity of 90%. As seen, at a prevalence of 10%, the effect of sensitivity on PPV diminishes as the sensitivity increased beyond ~60% (solid red line) while the NPV increased at a higher rate (blue line with stars). These effects are more dramatically observed with a higher prevalence of 40% (black line with triangles).


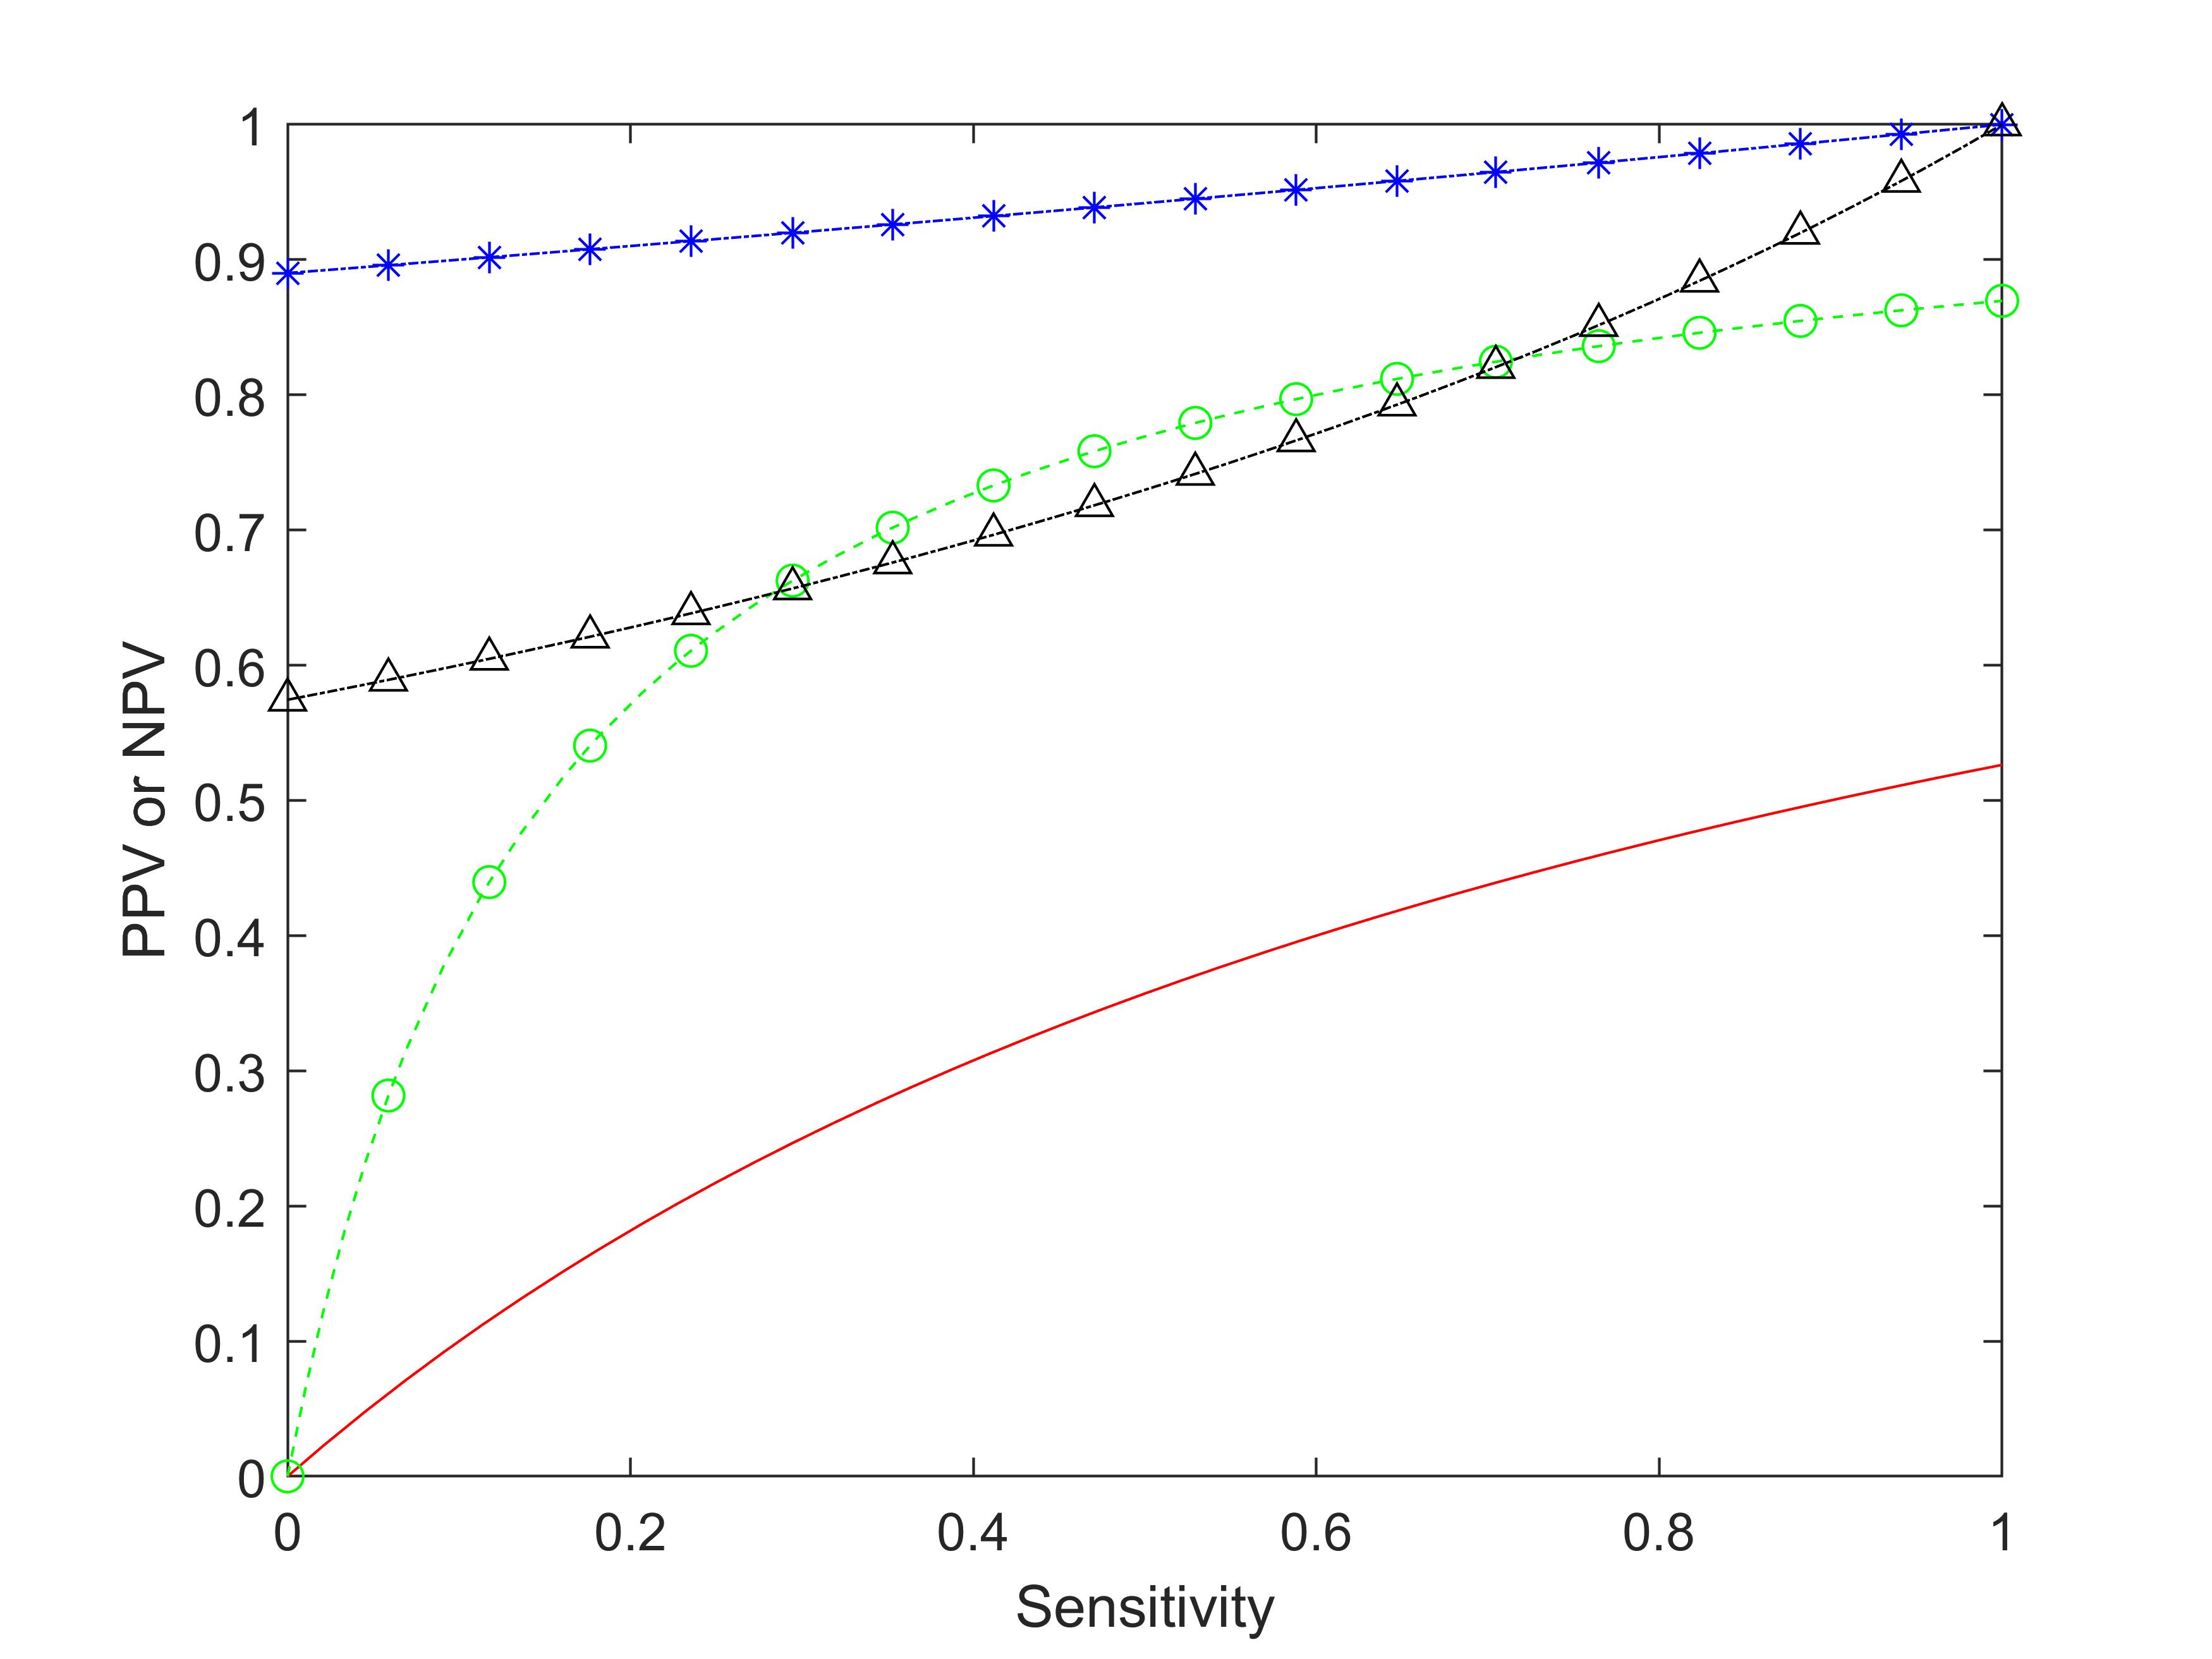


**Supplemental Figure S3**: PPV and NPV as a function of specificity (while keeping the prevalence and sensitivity constant). PPV (solid red line) and NPV (blue line with stars) were constructed using a prevalence of 10% and a sensitivity of 95%. Similarly, a second PPV (green line with circles) and NPV (black line with triangles) were constructed using a prevalence of 40% and a sensitivity of 95%. As seen, at a prevalence of 10%, the effect of sensitivity on PPV increased dramatically after the specificity >~80% (solid red line). However, the specificity virtually has no impact on the NPV when the specificity >~20% (blue line with stars). These effects are also seen when the prevalence is higher (at 40%) but less dramatic.


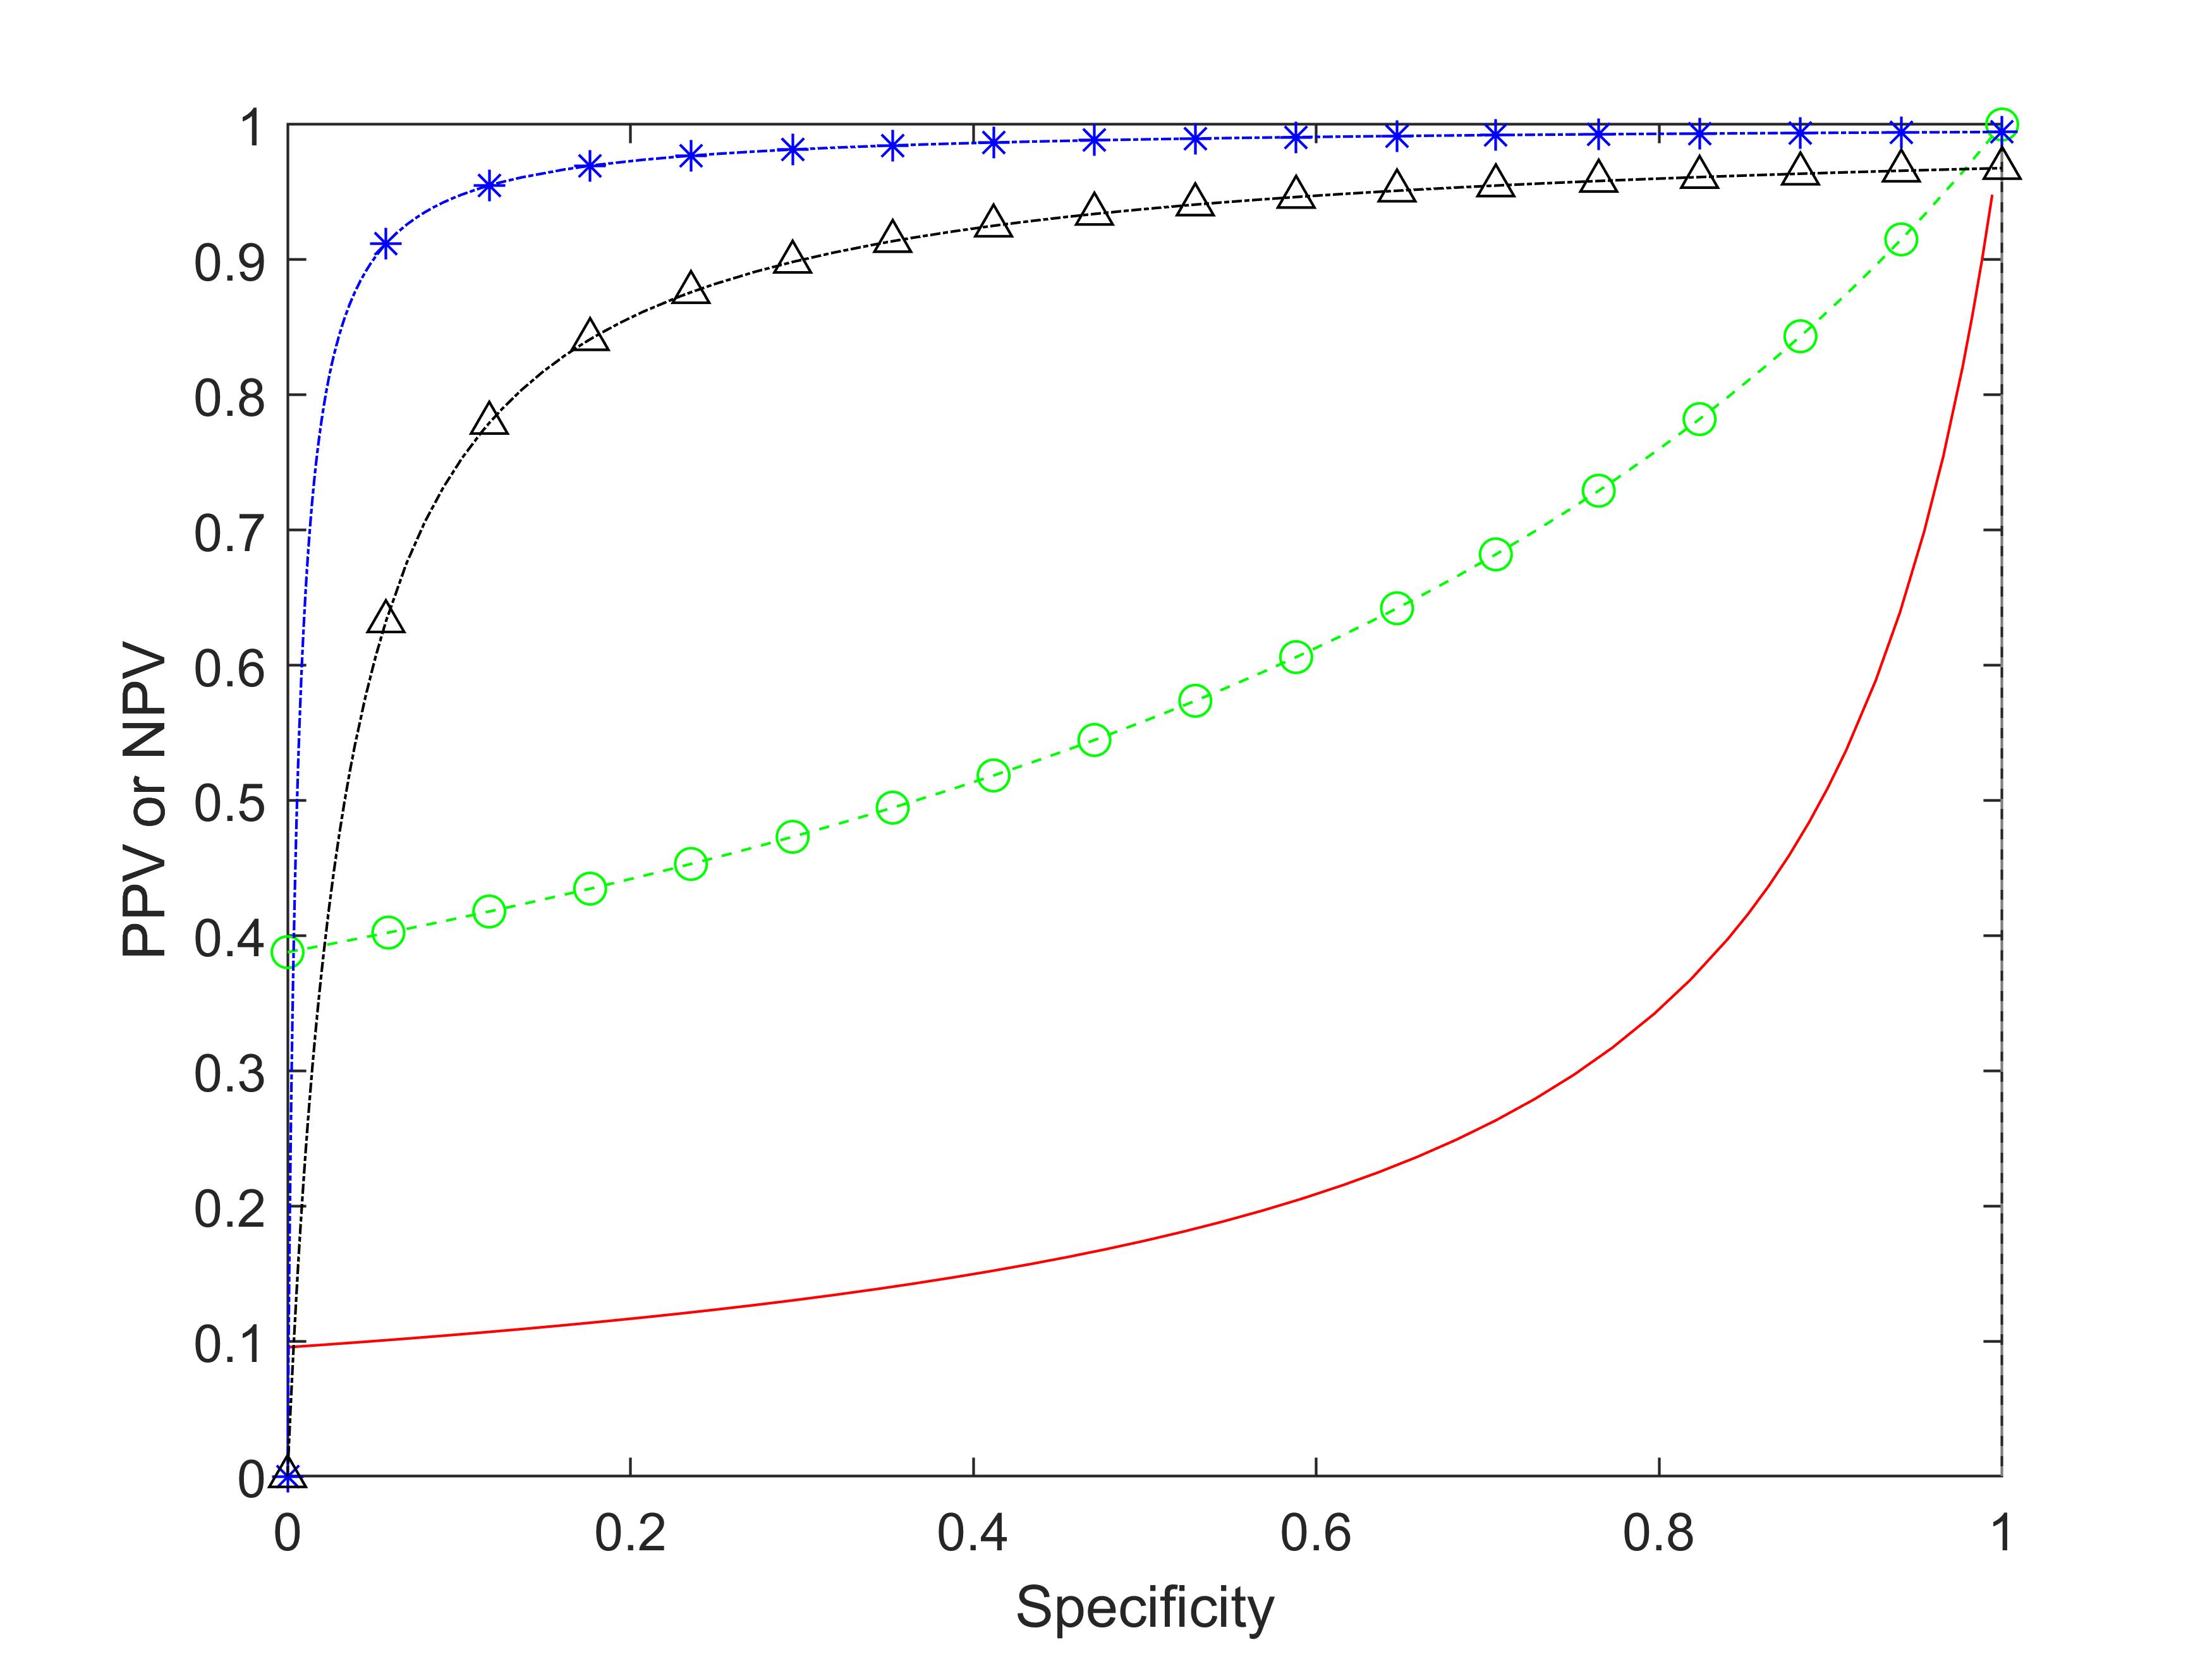

Supplement: lmaa045_suppl_supplemental_information.docx [file lmaa045_suppl_supplemental_information.docx]
